# Supplementary material
Source: publisher site journal article supplement (https://www.dovepress.com/article/263756)
Supplement: Supplementary file 1 [file get_supplementary_file.php]

**Supplementary data**

Figure S1.Structure of N3-Alendronate. Chemical Formula: C8H18N4O8P2; Exact Mass: 360.0600; Molecular Weight: 360.1980


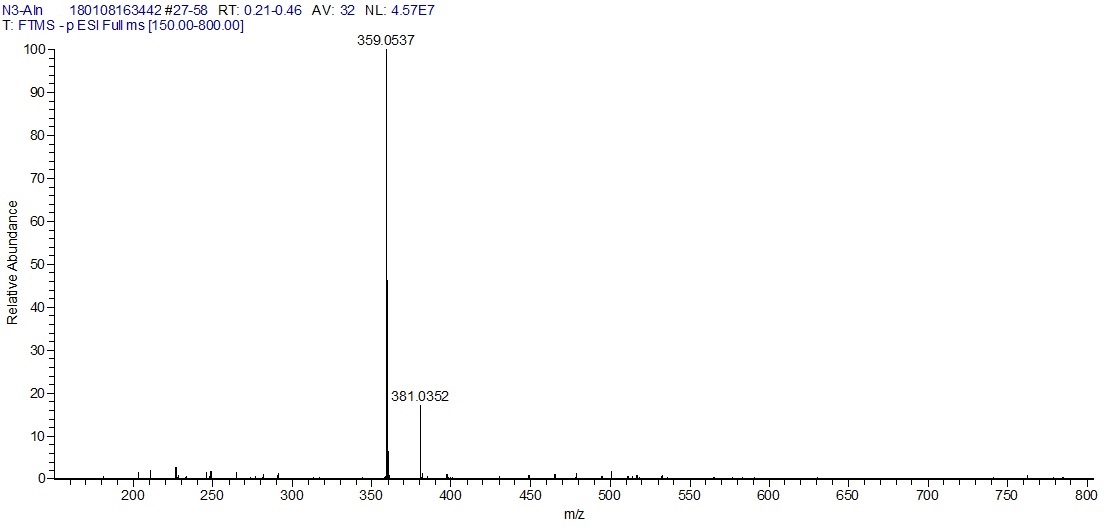


Figure S2.ESI-MS of N3-Alendronate (negative mode).Calculated: 360.06. Found: 359.05 (M-H), 381.04 (M-H+Na)
